# Supplementary material for: Potential Factors Influencing the Academic Performance of Pharmacy Undergraduates at Umm Al-Qura University: A Cross-Sectional Survey
Source: Research Square preprint supplement (doi:10.21203/rs.3.rs-6087526/v1), 2025-04-15
Supplement: Supplementary file 1 [file 95fcf6718cdede14aaf13a8b.pdf]

Other Factors Affecting Students' High & Low GPAs<sup>a</sup>

| Affecting factors                      | GPAs <sup>a</sup> < 3.5 |       | GPAs <sup>a</sup> ≥ 3.5 |       | <i>p</i> -value |
|----------------------------------------|-------------------------|-------|-------------------------|-------|-----------------|
|                                        | N                       | (%)   | N                       | (%)   |                 |
| Family status                          |                         |       |                         |       |                 |
| Number of family members               |                         |       |                         |       |                 |
| 1 to 10 members                        | 150                     | 95.5% | 90                      | 95.7% | 0.939           |
| 11 to 20 members                       | 7                       | 4.5%  | 4                       | 4.3%  |                 |
| Living with family                     |                         |       |                         |       |                 |
| No                                     | 5                       | 3.2%  | 5                       | 5.3%  | 0.403           |
| Yes                                    | 152                     | 96.8% | 89                      | 94.7% |                 |
| Family issues                          |                         |       |                         |       |                 |
| Divorced parents                       | 8                       | 5.1%  | 5                       | 5.3%  | 0.082           |
| Death of a first relative              | 18                      | 11.5% | 16                      | 17.0% |                 |
| A family member with chronic illnesses | 47                      | 29.9% | 15                      | 16.0% |                 |
| I do not have any problem              | 84                      | 53.5% | 58                      | 61.7% |                 |
| Socially responsible <sup>b</sup>      |                         |       |                         |       |                 |
| No                                     | 92                      | 58.6% | 60                      | 63.8% | 0.412           |
| Yes                                    | 65                      | 41.4% | 34                      | 36.2% |                 |
| Lifestyle                              |                         |       |                         |       |                 |
| Smoking                                |                         |       |                         |       |                 |
| Smoker                                 | 32                      | 20.4% | 13                      | 13.8% | 0.19            |
| Non-Smoker                             | 125                     | 79.6% | 81                      | 86.2% |                 |
| Caffeine consumption <sup>c</sup>      |                         |       |                         |       |                 |
| Once every day                         | 76                      | 48.4% | 44                      | 46.8% | 0.533           |
| Several times every day                | 44                      | 28.0% | 32                      | 34.0% |                 |
| I do not consume caffeinated drinks    | 37                      | 23.6% | 18                      | 19.1% |                 |
| Social activity                        |                         |       |                         |       |                 |
| Spend time with friends                |                         |       |                         |       |                 |
| Every day                              | 26                      | 16.6% | 12                      | 12.8% | 0.135           |
| <3 times/week                          | 92                      | 58.6% | 47                      | 50.0% |                 |
| ≥ 3 times/week                         | 18                      | 11.5% | 12                      | 12.8% |                 |

|                                                |    |       |    |       |       |
|------------------------------------------------|----|-------|----|-------|-------|
| Do not spend time with my friends              | 21 | 13.4% | 23 | 24.5% |       |
| Extracurricular activities <sup>d</sup>        |    |       |    |       |       |
| Every day                                      | 11 | 7.0%  | 10 | 10.6% | 0.779 |
| Spend <3 times/week with my friends            | 14 | 8.9%  | 8  | 8.5%  |       |
| Spend ≥3 times/week with my friends            | 53 | 33.8% | 29 | 30.9% |       |
| Do not spend time on such activities           | 79 | 50.3% | 47 | 50.0% |       |
| Medical conferences and courses                |    |       |    |       |       |
| Attend less than four events/year              | 65 | 41.4% | 39 | 41.5% | 0.201 |
| Attend more than four/year                     | 14 | 8.9%  | 3  | 3.2%  |       |
| Sleeping                                       |    |       |    |       |       |
| Nap habits                                     |    |       |    |       |       |
| Take a nap before studying, and sleep at night | 75 | 47.8% | 46 | 48.9% | 0.657 |
| Do not take naps, and just sleep at night      | 46 | 29.3% | 23 | 24.5% |       |
| I am an evening person                         | 36 | 22.9% | 25 | 26.6% |       |
| Sleeping hours/day                             |    |       |    |       |       |
| I sleep <6 hours/day                           | 42 | 26.8% | 32 | 34.0% | 0.43  |
| I sleep 6–8 hours/day                          | 94 | 59.9% | 49 | 52.1% |       |
| I sleep >8 hours/day                           | 21 | 13.4% | 13 | 13.8% |       |
| Exam habits                                    |    |       |    |       |       |
| Preparing for the exam 1 month before exam     | 74 | 47.1% | 37 | 39.4% | 0.381 |
| Preparing for the exam 2–3 weeks before exam   | 68 | 43.3% | 44 | 46.8% |       |
| Preparing for the exam Few days before exam    | 15 | 9.6%  | 13 | 13.8% |       |

N: number of participants; <sup>a</sup> Grade point averages; <sup>b</sup> Socially responsible for taking care of anyone in the family other than yourself (e.g.: doing house chores, sick family member, rising a child), <sup>c</sup> Caffeine consumption (coffee, Cola, Red Bull, etc); <sup>d</sup> Extracurricular activities (volunteer and charity work, organizing committees, etc)

#### Vacation Habits Affecting Students' High & Low GPAs<sup>a</sup>

| Vacation habits                          | GPAs <sup>a</sup> < 3.5 |       | GPAs <sup>a</sup> s ≥ 3.5 |       | p-value |
|------------------------------------------|-------------------------|-------|---------------------------|-------|---------|
|                                          | N                       | (%)   | N                         | (%)   |         |
| Start reading for the next year subjects | 18                      | 11.5% | 11                        | 11.7% | 0.955   |
| Have clinical training                   | 35                      | 22.3% | 19                        | 20.2% | 0.698   |
| Conduct research                         | 17                      | 10.8% | 11                        | 11.7% | 0.831   |

|                   |     |       |    |       |       |
|-------------------|-----|-------|----|-------|-------|
| Enjoy my vacation | 148 | 94.3% | 86 | 91.5% | 0.397 |
|-------------------|-----|-------|----|-------|-------|

N: number of participants; <sup>a</sup> Grade point averages

#### Study Resources Affecting Students' High & Low GPAs<sup>a</sup>

| Arrange the following resources according to their importance in your studying | GPAs <sup>a</sup> < 3.5 |       | GPAs <sup>a</sup> s ≥ 3.5 |       | p-value |
|--------------------------------------------------------------------------------|-------------------------|-------|---------------------------|-------|---------|
|                                                                                | N                       | (%)   | N                         | (%)   |         |
| Most important                                                                 | 67                      | 42.7% | 42                        | 44.7% | 0.298   |
| Very important                                                                 | 23                      | 14.6% | 22                        | 23.4% |         |
| Important                                                                      | 40                      | 25.5% | 19                        | 20.2% |         |
| Somewhat important                                                             | 19                      | 12.1% | 9                         | 9.6%  |         |
| Least important                                                                | 8                       | 5.1%  | 2                         | 2.1%  |         |
| Most important                                                                 | 5                       | 3.2%  | 3                         | 3.2%  | 0.999   |
| Very important                                                                 | 25                      | 15.9% | 14                        | 14.9% |         |
| Important                                                                      | 30                      | 19.1% | 18                        | 19.1% |         |
| Somewhat important                                                             | 33                      | 21.0% | 19                        | 20.2% |         |
| Least important                                                                | 64                      | 40.8% | 40                        | 42.6% |         |
| Most important                                                                 | 61                      | 38.9% | 37                        | 39.4% | 0.586   |
| Very important                                                                 | 42                      | 26.8% | 21                        | 22.3% |         |
| important                                                                      | 35                      | 22.3% | 22                        | 23.4% |         |
| Somewhat important                                                             | 9                       | 5.7%  | 10                        | 10.6% |         |
| Least important                                                                | 10                      | 6.4%  | 4                         | 4.3%  |         |
| Most important                                                                 | 12                      | 7.6%  | 11                        | 11.7% | 0.533   |
| Very important                                                                 | 54                      | 34.4% | 29                        | 30.9% |         |
| Important                                                                      | 35                      | 22.3% | 22                        | 23.4% |         |
| Somewhat important                                                             | 47                      | 29.9% | 23                        | 24.5% |         |
| Least important                                                                | 9                       | 5.7%  | 9                         | 9.6%  |         |
| Most important                                                                 | 12                      | 7.6%  | 1                         | 1.1%  | 0.228   |
| Very important                                                                 | 13                      | 8.3%  | 8                         | 8.5%  |         |
| Important                                                                      | 17                      | 10.8% | 13                        | 13.8% |         |
| Somewhat important                                                             | 49                      | 31.2% | 33                        | 35.1% |         |
| Least important                                                                | 66                      | 42.0% | 39                        | 41.5% |         |

N: number of participants; <sup>a</sup> Grade point averages

#### Study Methods and Habits Affecting Students' High & Low GPAs<sup>a</sup>

| Studying factor                          | GPAs <sup>a</sup> < 3.5 |        | GPAs <sup>a</sup> ≥ 3.5 |        | <i>p</i> -value |
|------------------------------------------|-------------------------|--------|-------------------------|--------|-----------------|
|                                          | N                       | (%)    | N                       | (%)    |                 |
| Study method                             |                         |        |                         |        |                 |
| Mapping                                  | 42                      | (26.8) | 22                      | (23.4) | 0.556           |
| Forming note                             | 67                      | (42.7) | 48                      | (51.1) | 0.197           |
| Highlighting                             | 93                      | (59.2) | 64                      | (68.1) | 0.161           |
| Summarizing                              | 91                      | (58)   | 49                      | (52.1) | 0.368           |
| Recording                                | 63                      | (40.1) | 33                      | (35.1) | 0.428           |
| Reading loudly                           | 73                      | (46.5) | 49                      | (52.1) | 0.388           |
| Reading silently                         | 18                      | (11.5) | 13                      | (13.8) | 0.582           |
| Start by reading then memorizing         | 96                      | (61.1) | 58                      | (61.7) | 0.930           |
| Start by memorizing                      | 15                      | (9.6)  | 11                      | (11.7) | 0.589           |
| Study habits                             |                         |        |                         |        |                 |
| Drink coffee                             | 96                      | (61.1) | 67                      | (71.3) | 0.104           |
| Eat snacks                               | 57                      | (36.3) | 31                      | (33)   | 0.593           |
| ensure silence and no interruptions      | 0                       | (0)    | 0                       | (0)    | NA              |
| Study in my living room                  | 91                      | (58)   | 56                      | (59.6) | 0.802           |
| Favor a certain body position            | 73                      | (46.5) | 45                      | (47.9) | 0.833           |
| Listening to Qur'an/music and television | 11                      | (7)    | 10                      | (10.6) | 0.315           |

N: number of participants; <sup>a</sup> Grade point averages; NA: not applicable; <sup>b</sup> Favor a certain body position (lying on the floor, sitting on a desk).

#### Academic Resilience Affecting Students' High & Low GPAs<sup>a</sup>

| Academic resilience                                                 | GPAs <sup>a</sup> < 3.5 |       | GPAs <sup>a</sup> ≥ 3.5 |       | <i>p</i> -value |
|---------------------------------------------------------------------|-------------------------|-------|-------------------------|-------|-----------------|
|                                                                     | N                       | %     | N                       | %     |                 |
| I would begin to doubt my chances of success in the PharmD program. |                         |       |                         |       |                 |
| Unlikely                                                            | 39                      | 63.9% | 22                      | 36.1% | 0.265           |

|                                                                                     |    |       |    |       |       |
|-------------------------------------------------------------------------------------|----|-------|----|-------|-------|
| Somewhat unlikely                                                                   | 19 | 54.3% | 16 | 45.7% |       |
| Neutral                                                                             | 46 | 66.7% | 23 | 33.3% |       |
| Somewhat likely                                                                     | 32 | 71.1% | 13 | 28.9% |       |
| Likely                                                                              | 21 | 51.2% | 20 | 48.8% |       |
| I would probably get depressed.                                                     |    |       |    |       |       |
| Unlikely                                                                            | 35 | 60.3% | 23 | 39.7% | 0.922 |
| Somewhat unlikely                                                                   | 19 | 57.6% | 14 | 42.4% |       |
| Neutral                                                                             | 31 | 63.3% | 18 | 36.7% |       |
| Somewhat likely                                                                     | 40 | 66.7% | 20 | 33.3% |       |
| Likely                                                                              | 32 | 62.7% | 19 | 37.3% |       |
| I would be very disappointed.                                                       |    |       |    |       |       |
| Unlikely                                                                            | 37 | 58.7% | 26 | 41.3% | 0.092 |
| Somewhat unlikely                                                                   | 19 | 47.5% | 21 | 52.5% |       |
| Neutral                                                                             | 44 | 66.7% | 22 | 33.3% |       |
| Somewhat likely                                                                     | 34 | 75.6% | 11 | 24.4% |       |
| Likely                                                                              | 23 | 62.2% | 14 | 37.8% |       |
| I would begin to think my chances of getting the job or residency I want were poor. |    |       |    |       |       |
| Unlikely                                                                            | 30 | 58.8% | 21 | 41.2% | 0.596 |
| Somewhat unlikely                                                                   | 25 | 59.5% | 17 | 40.5% |       |
| Neutral                                                                             | 33 | 62.3% | 20 | 37.7% |       |
| Somewhat likely                                                                     | 46 | 70.8% | 19 | 29.2% |       |
| Likely                                                                              | 23 | 57.5% | 17 | 42.5% |       |
| I would feel like everything was ruined and going wrong.                            |    |       |    |       |       |
| Unlikely                                                                            | 53 | 58.9% | 37 | 41.1% | 0.863 |
| Somewhat unlikely                                                                   | 24 | 64.9% | 13 | 35.1% |       |
| Neutral                                                                             | 33 | 67.3% | 16 | 32.7% |       |
| Somewhat likely                                                                     | 26 | 60.5% | 17 | 39.5% |       |
| Likely                                                                              | 21 | 65.6% | 11 | 34.4% |       |
| I would try to think of new solutions                                               |    |       |    |       |       |
| Unlikely                                                                            | 8  | 72.7% | 3  | 27.3% | 0.355 |

|                                                                               |     |       |    |       |       |
|-------------------------------------------------------------------------------|-----|-------|----|-------|-------|
| Somewhat unlikely                                                             | 8   | 80.0% | 2  | 20.0% |       |
| Neutral                                                                       | 23  | 71.9% | 9  | 28.1% |       |
| Somewhat likely                                                               | 32  | 55.2% | 26 | 44.8% |       |
| Likely                                                                        | 86  | 61.4% | 54 | 38.6% |       |
| I would use my past successes to help motivate myself.                        |     |       |    |       |       |
| Unlikely                                                                      | 3   | 50.0% | 3  | 50.0% | 0.268 |
| Somewhat unlikely                                                             | 4   | 57.1% | 3  | 42.9% |       |
| Neutral                                                                       | 17  | 77.3% | 5  | 22.7% |       |
| Somewhat likely                                                               | 33  | 71.7% | 13 | 28.3% |       |
| Likely                                                                        | 100 | 58.8% | 70 | 41.2% |       |
| I would set my own goals for achievements.                                    |     |       |    |       |       |
| Unlikely                                                                      | 3   | 42.9% | 4  | 57.1% | 0.392 |
| Somewhat unlikely                                                             | 6   | 85.7% | 1  | 14.3% |       |
| Neutral                                                                       | 15  | 68.2% | 7  | 31.8% |       |
| Somewhat likely                                                               | 46  | 66.7% | 23 | 33.3% |       |
| Likely                                                                        | 87  | 59.6% | 59 | 40.4% |       |
| I would seek encouragement from my family and friends                         |     |       |    |       |       |
| Unlikely                                                                      | 16  | 57.1% | 12 | 42.9% | 0.884 |
| Somewhat unlikely                                                             | 12  | 63.2% | 7  | 36.8% |       |
| Neutral                                                                       | 27  | 61.4% | 17 | 38.6% |       |
| Somewhat likely                                                               | 42  | 67.7% | 20 | 32.3% |       |
| Likely                                                                        | 60  | 61.2% | 38 | 38.8% |       |
| I would try to think about my strengths and weaknesses to help me work better |     |       |    |       |       |
| Unlikely                                                                      | 1   | 20.0% | 4  | 80.0% | 0.259 |
| Somewhat unlikely                                                             | 3   | 60.0% | 2  | 40.0% |       |
| Neutral                                                                       | 14  | 58.3% | 10 | 41.7% |       |
| Somewhat likely                                                               | 41  | 69.5% | 18 | 30.5% |       |
| Likely                                                                        | 98  | 62.0% | 60 | 38.0% |       |
| I would see the situation as a challenge                                      |     |       |    |       |       |
| Unlikely                                                                      | 5   | 62.5% | 3  | 37.5% | 0.283 |

|                                                        |    |       |    |       |       |
|--------------------------------------------------------|----|-------|----|-------|-------|
| Somewhat unlikely                                      | 5  | 35.7% | 9  | 64.3% |       |
| Neutral                                                | 24 | 64.9% | 13 | 35.1% |       |
| Somewhat likely                                        | 42 | 60.9% | 27 | 39.1% |       |
| Likely                                                 | 81 | 65.9% | 42 | 34.1% |       |
| I would do my best to stop thinking negative thoughts. |    |       |    |       |       |
| Unlikely                                               | 4  | 66.7% | 2  | 33.3% | 0.691 |
| Somewhat unlikely                                      | 8  | 80.0% | 2  | 20.0% |       |
| Neutral                                                | 24 | 68.6% | 11 | 31.4% |       |
| Somewhat likely                                        | 35 | 60.3% | 23 | 39.7% |       |
| Likely                                                 | 86 | 60.6% | 56 | 39.4% |       |
| I would see the situation as temporary                 |    |       |    |       |       |
| Unlikely                                               | 9  | 52.9% | 8  | 47.1% | 0.673 |
| Somewhat unlikely                                      | 10 | 55.6% | 8  | 44.4% |       |
| Neutral                                                | 40 | 58.8% | 28 | 41.2% |       |
| Somewhat likely                                        | 45 | 67.2% | 22 | 32.8% |       |
| Likely                                                 | 53 | 65.4% | 28 | 34.6% |       |
| I would change my career plans                         |    |       |    |       |       |
| Unlikely                                               | 22 | 73.3% | 8  | 26.7% | 0.380 |
| Somewhat unlikely                                      | 18 | 69.2% | 8  | 30.8% |       |
| Neutral                                                | 39 | 55.7% | 31 | 44.3% |       |
| Somewhat likely                                        | 43 | 66.2% | 22 | 33.8% |       |
| Likely                                                 | 35 | 58.3% | 25 | 41.7% |       |
| I would not change my long-term goals and ambitions    |    |       |    |       |       |
| Unlikely                                               | 9  | 60.0% | 6  | 40.0% | 0.174 |
| Somewhat unlikely                                      | 9  | 40.9% | 13 | 59.1% |       |
| Neutral                                                | 35 | 59.3% | 24 | 40.7% |       |
| Somewhat likely                                        | 42 | 64.6% | 23 | 35.4% |       |
| Likely                                                 | 62 | 68.9% | 28 | 31.1% |       |

N: number of participants; <sup>a</sup> Grade point averages
